# Supplementary material for: Highly luminescent π-conjugated dithienometalloles: photophysical properties and their application in organic light-emitting diodes
Source: Royal Society of Chemistry journal article supplement (doi:10.1039/c2jm33526c), 2012-01-01
Supplement: c2jm33526c.pdf [file c2jm33526c.pdf]

Electronic Supplementary Information (ESI)

**Highly Luminescent  $\pi$ -Conjugated Dithienometalloles:  
Photophysical Properties and Application to  
Organic Light-Emitting Diodes**

**Ryosuke Kondo,<sup>a</sup> Takuma Yasuda,<sup>\*a,b</sup> Yu Seok Yang,<sup>a</sup> Jun Yun Kim,<sup>a</sup> and  
Chihaya Adachi<sup>\*a</sup>**

- <sup>a</sup> Department of Applied Chemistry, Graduate School of Engineering, and Center for Organic Photonics and Electronics Research (OPERA), Kyushu University  
744 Motoooka, Nishi-ku, Fukuoka 819-0395, Japan  
E-mail: yasuda@cstf.kyushu-u.ac.jp; adachi@cstf.kyushu-u.ac.jp
- <sup>b</sup> PRESTO, Japan Science and Technology Agency (JST)  
4-1-8 Honcho Kawaguchi, Saitama 322-0012, Japan

**Table of Contents:**

**Synthetic details**

- Table S1.** Crystallographic data and structural refinement for dithienometalloles.
- Figure S1.** UV/vis absorption spectra of dithienometalloles in CH<sub>2</sub>Cl<sub>2</sub> solution.
- Figure S2.** PL spectra and PL decay profiles for 3 wt% dithienometallole:TBADN codeposited thin films.
- Figure S3.** Photoelectron spectra of thin films of dithienometalloles in air.
- Figure S4.** Transient electroluminescence responses of the SO<sub>2</sub>-BT-based device.

**Materials and Syntheses.** Commercially available reagents and solvents were used without further purification unless otherwise noted. 3,3'-Dibromo-2,2'-bithiophene and dithieno[3,2-*b*:2',3'-*d*]thiophene were purchased from Aldrich. All reactions were performed under an N<sub>2</sub> atmosphere in dry solvents using standard Schlenk techniques. The synthetic routes for dithieno[3,2-*b*:2',3'-*d*]metallole derivatives are outlined in Scheme S1. Compounds **1**,<sup>1</sup> **2b**,<sup>1</sup> **3b**,<sup>1</sup> **4**,<sup>2</sup> **5**,<sup>2</sup> **PO-BT**,<sup>2</sup> and **BT**<sup>3</sup> were prepared according to the literature. All reactions were performed under an Ar atmosphere in dry solvents using standard Schlenk techniques unless otherwise noted.

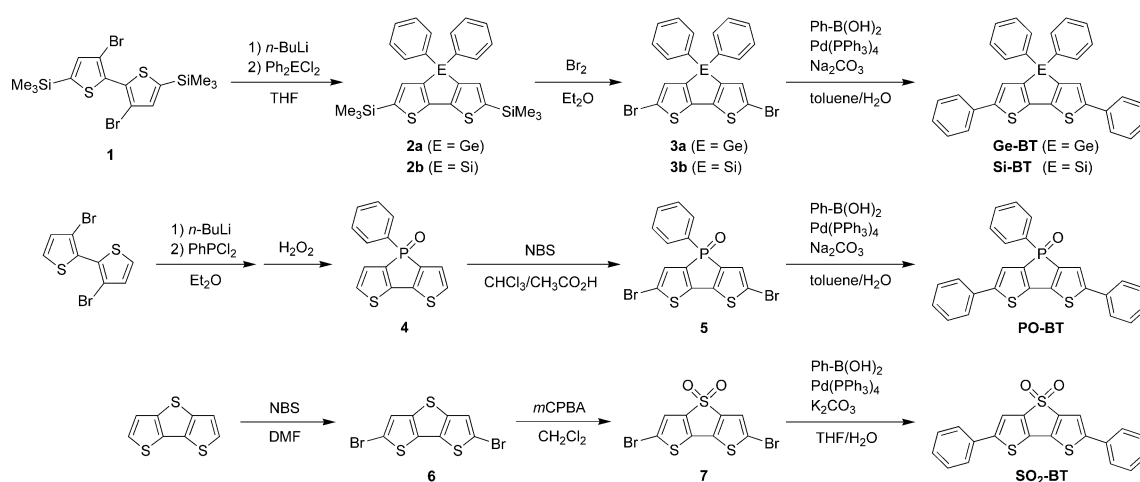

**Scheme S1.** Synthesis of  $\pi$ -conjugated dithieno[3,2-*b*:2',3'-*d*]metalloles.

**Synthesis of 2a.** To a stirred solution of 3,3'-dibromo-5,5'-bis(trimethylsilyl)-2,2'-bithiophene (**1**, 4.45 g, 9.5 mmol) in dry THF (400 mL) was added dropwise *n*-butyllithium (1.63 M, 11.7 mL, 19.0 mmol) at  $-78^{\circ}\text{C}$ , and the mixture was allowed to react for 2 h at that temperature. Dichlorodiphenylgermane (3.00 g, 10.1 mmol) was then added, and the mixture was stirred overnight at room temperature. The reaction mixture was poured into a large amount of water, and extracted with hexane. The combined organic layers were washed with water, and dried over anhydrous MgSO<sub>4</sub>. After filtration and evaporation, the product was purified by column chromatography on silica (eluent: hexane), and dried under vacuum to afford **2a** as a yellow solid (yield = 3.00 g, 59%). M.p.  $148^{\circ}\text{C}$ . <sup>1</sup>H NMR (500 MHz, CDCl<sub>3</sub>):  $\delta$  7.58 (dd, *J* = 7.8, 1.5 Hz,

4H), 7.40-7.35 (m, 6H), 7.27 (s, 2H), 0.33 (s, 18H).  $^{13}\text{C}\{^1\text{H}\}$  NMR (125 MHz,  $\text{CDCl}_3$ ): 153.12, 142.30, 141.99, 136.32, 134.74, 134.58, 129.67, 128.50, 0.13. MS:  $m/z$  535.83  $[M]^+$ . Anal. calcd (%) for  $\text{C}_{26}\text{H}_{30}\text{GeS}_2\text{Si}_2$ : C 58.32, H 5.65; found: C 57.94, H 5.52.

**Synthesis of 3a.** To a stirred solution of **2a** (2.68 g, 5.0 mmol) in dry diethyl ether (150 mL) was added dropwise bromine (1.60 g, 10.0 mmol) at  $-78^\circ\text{C}$ , and the mixture was allowed to react for 2 h at that temperature. The reaction mixture was allowed to warm up to room temperature, and then quenched with an aqueous  $\text{Na}_2\text{S}_2\text{O}_3$  (ca. 5%). The formed precipitate was collected by filtration, and washed with hexane to give **3a** as white solid (yield = 2.00 g, 73%). M.p.  $252^\circ\text{C}$ .  $^1\text{H}$  NMR (500 MHz,  $\text{CDCl}_3$ ):  $\delta$  7.52 (dd,  $J = 7.5, 1.5$  Hz, 4H), 7.45-7.35 (m, 6H), 7.14 (s, 2H).  $^{13}\text{C}\{^1\text{H}\}$  NMR (125 MHz,  $\text{CDCl}_3$ ):  $\delta$  147.65, 139.68, 134.49, 132.86, 132.06, 130.20, 128.77, 112.14. MS:  $m/z$  549.56  $[M]^+$ . Anal. calcd (%) for  $\text{C}_{20}\text{H}_{12}\text{Br}_2\text{GeS}_2$ : C 43.77, H 2.20; found: C 43.74, H 2.15.

**Synthesis of 6.** To a stirred solution of dithieno[3,2-*b*:2',3'-*d*]thiophene (2.94 g, 15.0 mmol) in dry DMF (60 mL) was added slowly *N*-bromosuccinimide (NBS, 5.87 g, 33.0 mmol) at  $0^\circ\text{C}$ . The mixture was allowed to warm up to room temperature and stirred overnight. The reaction mixture was poured into water to form a precipitate. The precipitate was collected by filtration and washed with methanol. The product was recrystallized from chloroform/methanol and dried under vacuum to give **6** as an off-white solid (yield = 5.14 g, 97%). M.p.  $171^\circ\text{C}$ .  $^1\text{H}$  NMR (500 MHz,  $\text{CDCl}_3$ ):  $\delta$  7.28 (s, 2H).  $^{13}\text{C}\{^1\text{H}\}$  NMR (125 MHz,  $\text{CDCl}_3$ ):  $\delta$  139.11, 130.88, 123.23, 112.38. MS:  $m/z$  353.64  $[M]^+$ . Anal. calcd (%) for  $\text{C}_8\text{H}_2\text{Br}_2\text{S}_3$ : C 27.13, H 0.57; found: C 27.38, H 0.61.

**Synthesis of 7.** To a solution of **6** (4.25 g, 12.0 mmol) in dry dichloromethane (200 mL) was added slowly *m*-chloroperbenzoic acid (*m*CPBA, 77%, 24.0 mmol) at room temperature. The solution was stirred for 72 h at room temperature. Subsequently, the mixture was quenched with an aqueous  $\text{NaHSO}_3$  (ca. 5%), and extracted with chloroform. The combined organic layers were washed with water, and dried over anhydrous  $\text{MgSO}_4$ . After filtration and evaporation, the product was purified by column chromatography on silica (eluent: chloroform), recrystallized from

chloroform/hexane, and dried under vacuum to afford **7** as a yellow solid (yield = 2.83 g, 61%). M.p. 303 °C (decomp.).  $^1\text{H}$  NMR (500 MHz,  $\text{CDCl}_3$ ):  $\delta$  7.23 (s, 2H).  $^{13}\text{C}\{^1\text{H}\}$  NMR (125 MHz,  $\text{CDCl}_3$ ):  $\delta$  141.29, 135.27, 122.76, 117.04. MS:  $m/z$  385.66  $[M]^+$ . Anal. calcd (%) for  $\text{C}_8\text{H}_2\text{Br}_2\text{O}_2\text{S}_3$ : C 24.89, H 0.52; found: C 24.99, H 0.55.

**Synthesis of Ge-BT.** To a solution of **3a** (0.99 g, 1.8 mmol) and phenylboronic acid (0.52 g, 4.3 mmol) in dry toluene (40 mL) were added  $\text{Pd}(\text{PPh}_3)_4$  (0.21 g, 0.18 mmol) and aqueous  $\text{Na}_2\text{CO}_3$  (2.0 M, 20 mL;  $\text{N}_2$  bubbled before use). The mixture was stirred for 24 h at 60 °C. After cooling to room temperature, the reaction mixture was poured into water, and then extracted with chloroform. The combined organic layers were washed with water, and dried over anhydrous  $\text{MgSO}_4$ . After filtration and evaporation, the product was purified by column chromatography on silica (eluent: chloroform) and dried under vacuum to afford **Ge-BT** as a yellow solid (yield = 0.82 g, 84%). This compound was further purified by sublimation before use. M.p. 220 °C.  $^1\text{H}$  NMR (500 MHz,  $\text{CDCl}_3$ ):  $\delta$  7.63 (dd,  $J = 7.8, 1.5$  Hz, 4H), 7.61 (dd,  $J = 7.8, 1.5$  Hz, 4H), 7.43 (s, 2H), 7.42-7.34 (m, 10H), 7.27-7.23 (m, 2H).  $^{13}\text{C}\{^1\text{H}\}$  NMR (125 MHz,  $\text{CDCl}_3$ ):  $\delta$  147.07, 145.91, 141.50, 134.69, 134.51, 133.92, 129.91, 128.95, 128.66, 127.35, 125.65. MS:  $m/z$  544.82  $[M]^+$ . Anal. calcd (%) for  $\text{C}_{32}\text{H}_{22}\text{GeS}_2$ : C 70.74, H 4.05; found: C 70.66, H 4.08.

**Synthesis of Si-BT.** This compound was prepared in a fashion similar to that above, using **3b** (0.92 g, 1.8 mmol), phenylboronic acid (0.55 g, 4.5 mmol), and  $\text{Pd}(\text{PPh}_3)_4$  (0.21 g, 0.18 mmol). The product was obtained as a yellow solid (yield = 0.66 g, 74%). M.p. 240 °C.  $^1\text{H}$  NMR (500 MHz,  $\text{CDCl}_3$ ):  $\delta$  7.70 (dd,  $J = 8.0, 1.5$  Hz, 4H), 7.62 (dd,  $J = 8.0, 1.5$  Hz, 4H), 7.46 (s, 2H), 7.45-7.35 (m, 10H), 7.28-7.24 (m, 2H).  $^{13}\text{C}\{^1\text{H}\}$  NMR (125 MHz,  $\text{CDCl}_3$ ):  $\delta$  149.58, 146.16, 140.94, 135.47, 134.48, 131.57, 130.45, 128.96, 128.28, 127.39, 125.71. MS:  $m/z$  497.90  $[M]^+$ . Anal. calcd (%) for  $\text{C}_{32}\text{H}_{22}\text{S}_2\text{Si}$ : C 77.06, H 4.45; found: C 77.04, H 4.40.

**Synthesis of  $\text{SO}_2$ -BT.** This compound was prepared in a fashion similar to that above, using **7** (2.32 g, 6.0 mmol), phenylboronic acid (1.76 g, 14.4 mmol), and  $\text{Pd}(\text{PPh}_3)_4$  (0.69 g, 0.60 mmol). The product was obtained as an orange solid (yield = 1.97 g, 86%). M.p. 308 °C.  $^1\text{H}$  NMR (500 MHz,  $\text{CDCl}_3$ ):  $\delta$  7.57 (dd,  $J = 8.5, 1.5$  Hz, 4H), 7.44 (dd,  $J = 8.5, 7.0$  Hz, 4H), 7.40 (s, 2H), 7.40-7.37 (m, 2H).  $^{13}\text{C}\{^1\text{H}\}$  NMR

(125 MHz, CDCl<sub>3</sub>):  $\delta$  149.63, 143.07, 134.26, 132.77, 129.36, 129.15, 125.87, 115.53.  
MS:  $m/z$  379.89 [ $M$ ]<sup>+</sup>. Anal. calcd (%) for C<sub>20</sub>H<sub>12</sub>O<sub>2</sub>S<sub>3</sub>: C 63.13, H 3.18; found: C 63.22, H 3.12.

## References

- 1 (a) J. Ohshita, M. Nodono, H. Kai, T. Watanabe, A. Kunai, K. Komaguchi, M. Shiotani, A. Adachi, K. Okita, Y. Harima, K. Yamashita and M. Ishikawa, *Organometallics*, 1999, **18**, 1453; (b) J. Ohshita, H. Kai, A. Takata, T. Iida, A. Kunai, N. Ohta, K. Komaguchi, M. Shiotani, A. Adachi, K. Sakamaki and K. Okita, *Organometallics*, 2001, **20**, 4800; (c) D.-H. Kim, J. Ohshita, K.-H. Lee, Y. Kunugi and A. Kunai, *Organometallics*, 2006, **25**, 1511.
- 2 (a) T. Baumgartner, T. Neumann and B. Wirges, *Angew. Chem. Int. Ed.*, 2004, **43**, 6197; (b) T. Baumgartner, W. Bergmans, T. Kárpáti, T. Neumann, M. Nieger and L. Nyulászi, *Chem. Eur. J.*, 2005, **11**, 4687; (c) Y. Dienes, S. Durben, T. Kárpáti, T. Neumann, U. Englert, L. Nyulászi and T. Baumgartner, *Chem. Eur. J.*, 2007, **13**, 7487.
- 3 S. Hotta, S. A. Lee and T. Tamaki, *J. Heterocycl. Chem.*, 2000, **37**, 25.

**Table S1.** Crystallographic data and structural refinement for dithienometalloles<sup>a</sup>

|                                                     | <b>Ge-BT</b>                                     | <b>Si-BT</b>                                      | <b>SO<sub>2</sub>-BT</b>                                      |
|-----------------------------------------------------|--------------------------------------------------|---------------------------------------------------|---------------------------------------------------------------|
| molecular formula                                   | C <sub>32</sub> H <sub>22</sub> GeS <sub>2</sub> | C <sub>32</sub> H <sub>22</sub> S <sub>2</sub> Si | C <sub>20</sub> H <sub>12</sub> O <sub>2</sub> S <sub>3</sub> |
| <i>M</i> [g/mol]                                    | 543.24                                           | 498.73                                            | 380.49                                                        |
| crystal system                                      | monoclinic                                       | monoclinic                                        | monoclinic                                                    |
| <i>T</i> [K]                                        | 153                                              | 93                                                | 93                                                            |
| <i>λ</i> [Å]                                        | 0.71075                                          | 0.71075                                           | 0.71075                                                       |
| space group                                         | <i>C</i> 12/ <i>c</i> 1 (#15)                    | <i>C</i> 12/ <i>c</i> 1 (#15)                     | <i>C</i> 12/ <i>c</i> 1 (#15)                                 |
| <i>a</i> [Å]                                        | 19.822(7)                                        | 19.549(7)                                         | 16.192(3)                                                     |
| <i>b</i> [Å]                                        | 20.141(7)                                        | 19.718(6)                                         | 15.167(3)                                                     |
| <i>c</i> [Å]                                        | 6.596(3)                                         | 6.618(2)                                          | 13.658(3)                                                     |
| <i>α</i> [°]                                        | 90.0000                                          | 90.0000                                           | 90.0000                                                       |
| <i>β</i> [°]                                        | 102.289(5)                                       | 101.413(5)                                        | 96.209(3)                                                     |
| <i>γ</i> [°]                                        | 90.0000                                          | 90.0000                                           | 90.0000                                                       |
| <i>V</i> [Å <sup>3</sup> ]                          | 2573.0(18)                                       | 2500.6(14)                                        | 3334.5(12)                                                    |
| <i>Z</i>                                            | 4                                                | 4                                                 | 8                                                             |
| <i>D</i> <sub>calcd</sub> [g/cm <sup>3</sup> ]      | 1.402                                            | 1.325                                             | 1.516                                                         |
| <i>F</i> (000)                                      | 1112                                             | 1040                                              | 1568                                                          |
| <i>θ</i> range [°]                                  | 3.20-27.60                                       | 3.10-27.50                                        | 3.10-27.50                                                    |
| no. reflections collected                           | 3960                                             | 4171                                              | 5874                                                          |
| no. independent reflections                         | 2948                                             | 2869                                              | 3817                                                          |
| data/restraints/parameters                          | 2948/142/159                                     | 2869/0/159                                        | 3817/0/226                                                    |
| GOF on <i>F</i> <sup>2</sup>                        | 1.000                                            | 1.083                                             | 1.171                                                         |
| final <i>R</i> indices [ <i>I</i> > 2σ( <i>I</i> )] | <i>R</i> <sub>1</sub> = 0.0439                   | <i>R</i> <sub>1</sub> = 0.0312                    | <i>R</i> <sub>1</sub> = 0.0506                                |
|                                                     | <i>wR</i> <sub>2</sub> = 0.1065                  | <i>wR</i> <sub>2</sub> = 0.0879                   | <i>wR</i> <sub>2</sub> = 0.1299                               |

<sup>a</sup> The refinement method was full-matrix least-squares on *F*<sup>2</sup> for all three compounds.

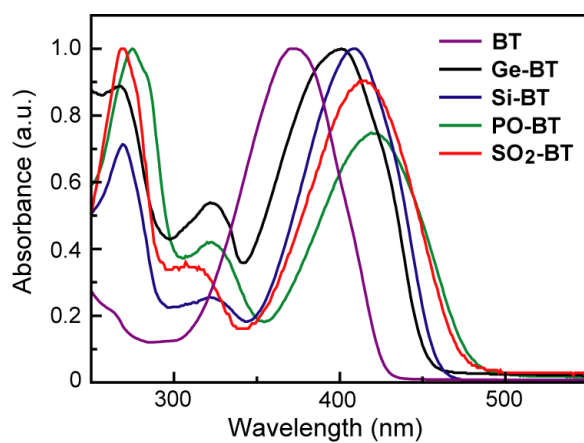

**Figure S1.** UV/vis absorption spectra of dithienometalloles in  $\text{CH}_2\text{Cl}_2$  solution.

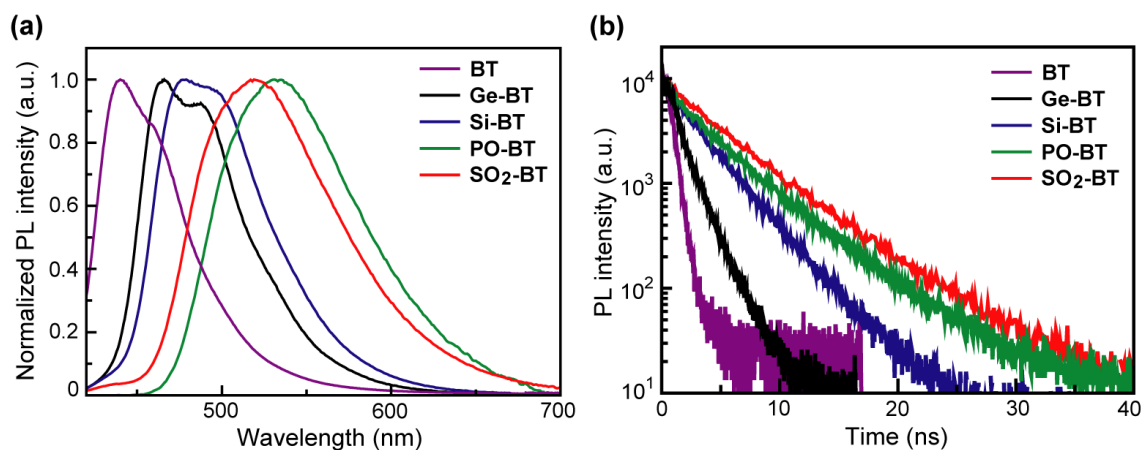

**Figure S2.** (a) Photoluminescence (PL) spectra and (b) PL decay profiles of 3 wt% dithienometallole:TBADN codeposited thin films after excitation at 405 nm at 293 K.

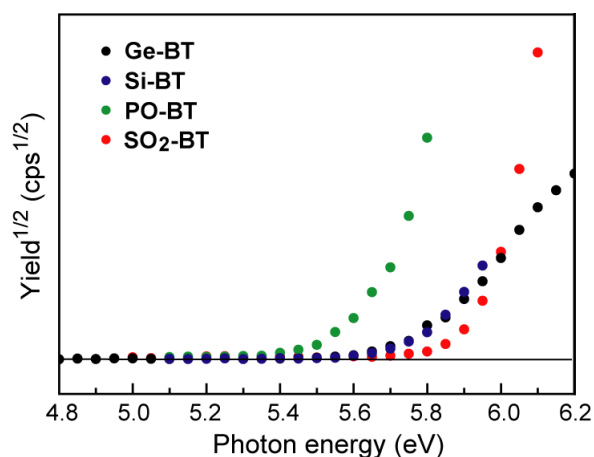

**Figure S3.** Photoelectron spectra of thin films of dithienometalloles in air.

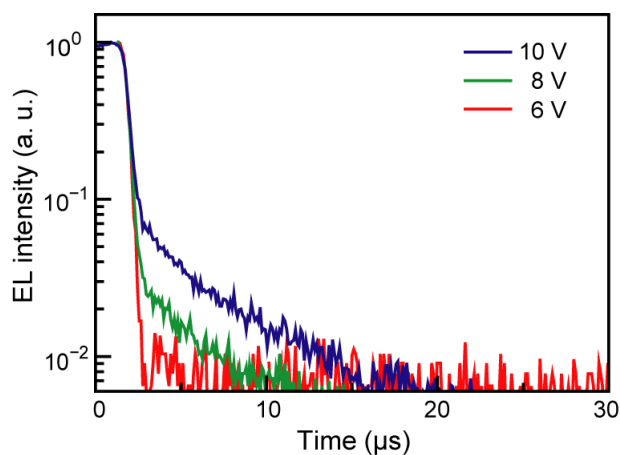

**Figure S4.** Transient electroluminescence (EL) responses of the **SO<sub>2</sub>-BT**-based device with different excitation pulse voltages. The EL intensity rapidly decreased at the end of the excitation pulse, because of the short lifetime of fluorescence from **SO<sub>2</sub>-BT**. After the first rapid EL component, a delayed EL component with the lifetime of 5–7  $\mu$ s is observed, which can be ascribed to the emission from the triplet–triplet annihilation process.
